# Supplementary material
Source: MDPI journal article supplement (https://www.mdpi.com/2571-6131/7/1/26)
Supplement: s1 [file s1]

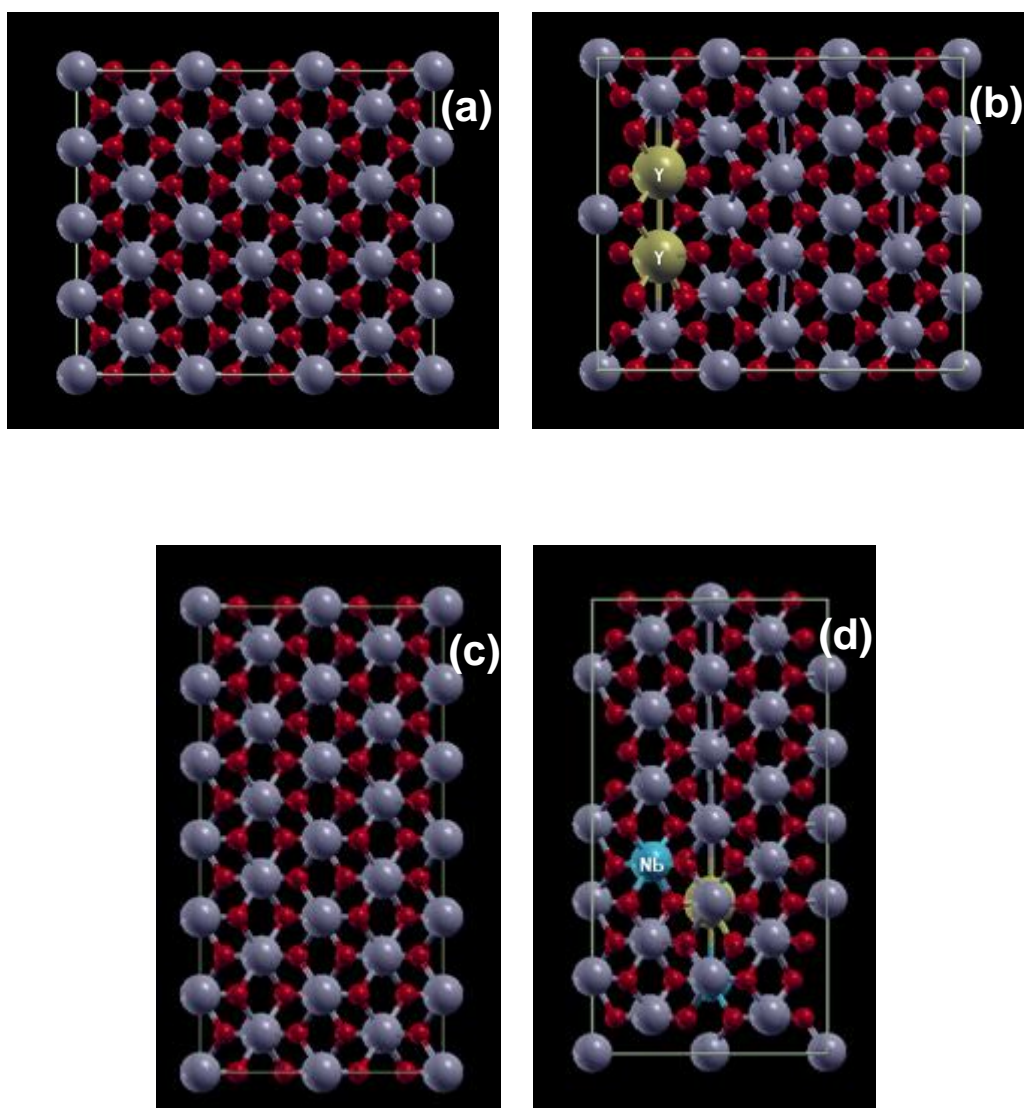

**Figure S2.** Structures of (a) rutile  $3 \times 2 \times 4$  supercell, (b) substitution of one Ti for two Y and one oxygen vacancy, (c) rutile  $2 \times 2 \times 6$  supercell, and (d) substitution of Ti for two Nb and one Y.
