# Supplementary material
Source: MDPI journal article supplement (https://www.mdpi.com/2571-6131/7/1/26)
Supplement: s1 [file s1]

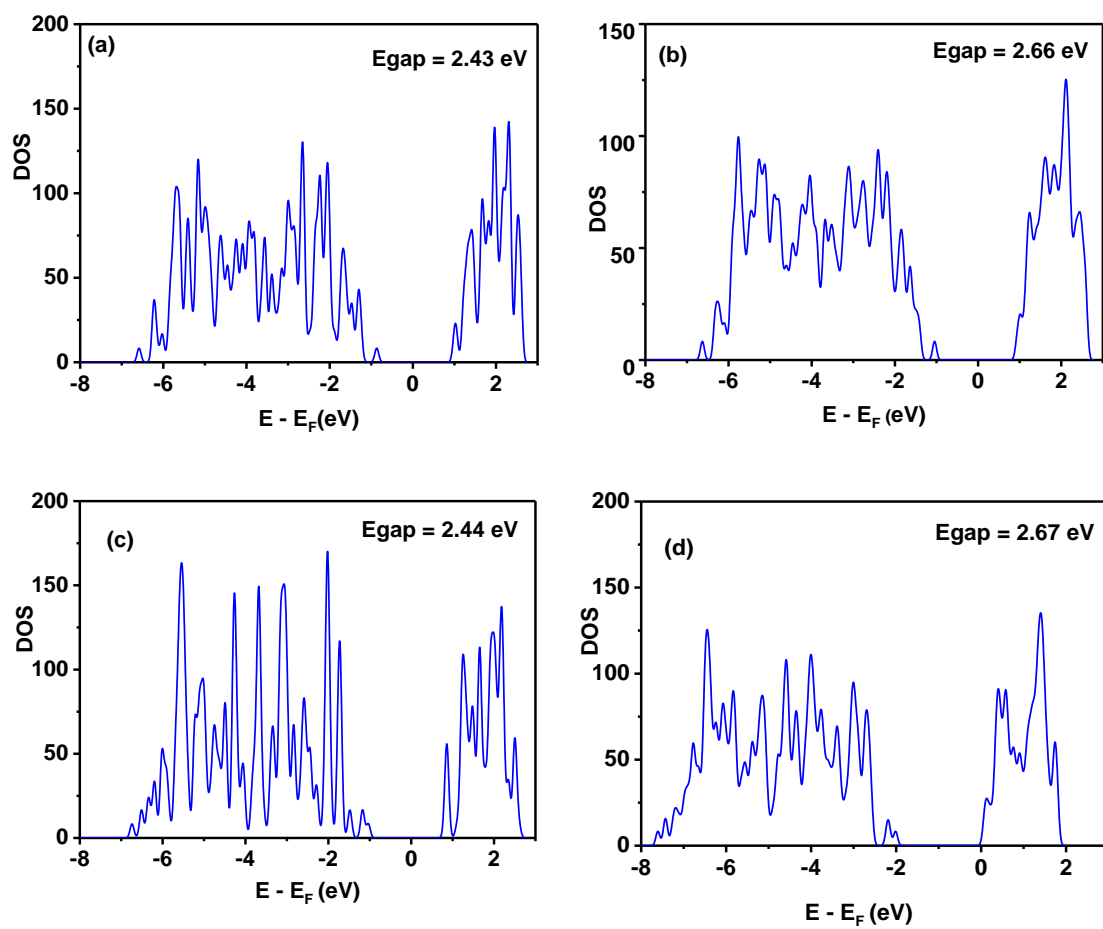

**Figure S3.** Density of states (DOS) of (a) rutile 3x2x4 supercell, (b) substitution of one Ti for two Y and one oxygen vacancy, (c) rutile 2x2x6 supercell, and (d) substitution of Ti for two Nb and one Y.
