# Supplementary material
Source: MDPI journal article supplement (https://www.mdpi.com/2571-6131/7/1/26)

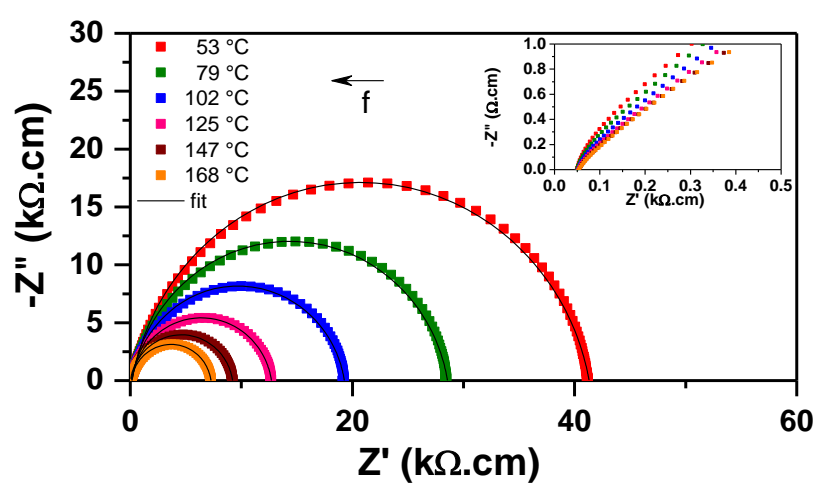

**Figure S1.** EIS spectra of YNTO5 sintered at 1480 °C. Inset: high frequency region.

Supplement: s1 [file s1]
